# Supplementary material for: A facile evanescent-field imaging approach for monitoring colloidal gel evolution near a surface
Source: Royal Society of Chemistry journal article supplement (doi:10.1039/d1sm00331c), 2021-01-01
Supplement: d1sm00331c5.pdf [file d1sm00331c5.pdf]

*Supplementary information for*

**A facile evanescent-field imaging approach for monitoring colloidal gel evolution near a surface**

Wei Liu,<sup>a,b,c,d</sup> Jiahao Wu,<sup>d</sup> Hui Zhu,<sup>c</sup> Chuanxin He,<sup>\*a</sup> and To Ngai<sup>\*d</sup>

<sup>a</sup>*College of Chemistry and Environmental Engineering, Shenzhen University, Shenzhen 518060, China*

<sup>b</sup>*Key Laboratory of Optoelectronic Devices and Systems of Ministry of Education and Guangdong Province, College of Optoelectronic Engineering, Shenzhen University, Shenzhen 518060, China*

<sup>c</sup>*College of Food Engineering and Biotechnology, Hanshan Normal University, Chaozhou 521041, China*

<sup>d</sup>*Department of Chemistry, The Chinese University of Hong Kong, Shatin, N.T., Hong Kong, China*

*\*Corresponding Authors: Hecx@szu.edu.cn; tongai@cuhk.edu.hk*

**Materials.** *N*-isopropylacrylamide (NIPAM) was recrystallized in a benzene/n-hexane mixture. *N,N'*-Methylenebis(acrylamide) (BIS) was recrystallized in methanol. Potassium persulfate (KPS) and sodium dodecyl sulfate (SDS) were used as received. All chemicals were purchased from Sigma-Aldrich, US as analytical reagent.

**Microgel Synthesis.** PNIPAM microgels were synthesized via a standard one-pot precipitation polymerization.<sup>1</sup> NIPAM (8.09 g), BIS (0.58 g), and SDS (0.29 g) were dissolved in 295 mL MilliQ water and put into a flask with a magnetic stirrer, a reflux condenser, and a nitrogen gas inlet. After the solution was stirred for 40 min at 70 °C under nitrogen, KSP (0.27 g)/5 mL MilliQ water was injected to initiate the polymerization. The reaction was maintained at 70 °C for 4 hours. To remove unreacted chemicals and surfactants, the dispersion was purified via filtration (0.45 μm Nylon filter membranes, Sigma-Aldrich, US) and dialysis (50 kDa MWCO, Spectra/Por Labs, CA) for 4 days. The dispersion was concentrated to 0.0554 g/mL by rotary evaporation.

**Characterizations.** The hydrodynamic diameter  $D_h$  of the microgels was determined by dynamic light scattering (ALV/DLS/SLS-5022F, correlator ALV5000,  $\lambda = 632.8$  nm) at  $c = 4.3 \times 10^{-7}$  w/w. The DLS data corresponded to the intensity autocorrelations at scattering angles from 20° to 40°, each

measurement was acquired over 300 seconds. The solution was allowed to equilibrate at least for 1 hour at each temperature before measurement.

The intrinsic viscosity  $[\eta]$  of the microgel dispersions was measured through a Cannon-Ubbelohde viscometer (No. 25-B164, Cannon Instrument Co., US) at  $c = 2\text{--}10$  mg/mL. The effective volume fraction  $\phi_{\text{eff}}$  of the microgels was estimated by  $\phi_{\text{eff}} = bcD_h^3/2.5$ , where  $b$  is the proportionality constant between  $[\eta]$  and  $D_h^3$  based on the Huggins and Mead–Fuoss plots.<sup>2-4</sup>

The zeta potential  $\zeta$  of the microgels was determined via a Zetasizer Nano (ZS90, Malvern Instruments Inc., UK) at  $c = 5.5 \times 10^{-5}$  w/w. The measurement was conducted three times at set temperatures with an equilibration time  $\geq 5$  min.  $\zeta$  is presented as the mean  $\pm$  standard deviation.

The penetration depth  $d_p$  was estimated by  $d_p = \lambda / [4\pi \sqrt{(n_1 \sin \theta)^2 - n_2^2}]$ , where  $\lambda = 632.8$  nm is the laser wavelength,  $\theta = 70^\circ$  is the incident angle,  $n_1 = 1.52$  is the refractive index of the  $70^\circ$  prism, and  $n_2 \approx 1.35$  is the refractive index of the dispersion at  $c = 0.0554$  g/mL at temperatures from  $\sim 35$  °C to  $40$  °C, which was measured by an Abbe refractometer (Model 102539, 2WA-J, Shanghai, CN).

**Instrumental setup.** The microgel dispersion was injected into an ultrathin flow cell ( $200 \mu\text{m}$  inner thickness, hollow rectangular capillaries, Borosilicate Glass Co., US), placed on a homemade thermal control device (see Fig. S2) including a recirculating water bath (THX-05, Ningbo Tianheng Instrument Co., CN), two Peltier modules (TEC1-06306, Hebei I.T. (Shanghai) Co. Ltd., CN), and a PID controller with three negative temperature coefficient (NTC) sensors (PR-59, Laird Technologies Inc., US). For each measurement, the temperature was increased from room temperature ( $\sim 25$  °C) to a set one at a rate of  $\sim 0.1$  °C/min. Once the set temperature is reached, the images were recorded for 10 s at  $t = 0$  s, 300 s, 600 s, and 1200 s, respectively.

The thermal control device was equipped on an inverted Leica DM LFSA microscope with a  $50\times$  objective (N PLAN, NA = 0.5, WD = 7 mm). An evanescent field was generated by a laser beam with a wavelength of 632.8 nm at the glass/liquid interface where the penetration depth  $d_p$  is  $\sim 110$  nm. The scattering images were captured by a sCMOS camera (Zyla 5.5,  $2560 \times 2160$  pixels, pixel size =  $6.5 \mu\text{m}$ , Andor Technology Ltd., UK) at a sampling rate of 10–50 fps. More details could be found in Fig. S2.

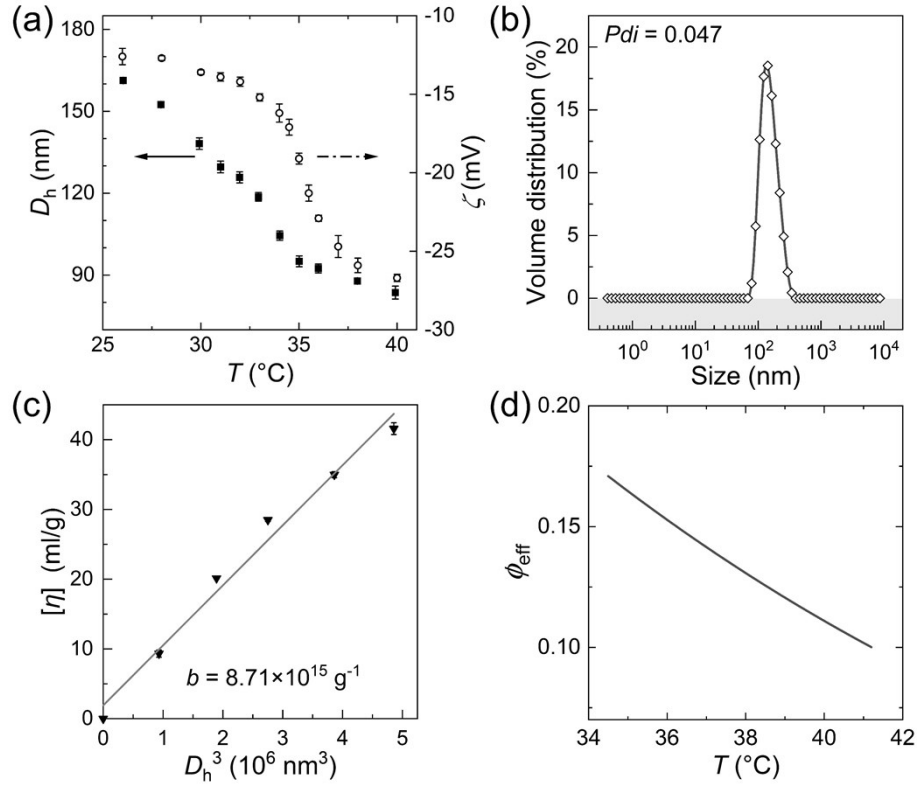

**Fig. S1** (a) The hydrodynamic diameter  $D_h$  (squares) and zeta potential  $\zeta$  (circles) of PNIPAM microgels as a function of temperature. (b) Typical particle size distribution of microgels at 25 °C. The polydispersity index ( $Pdi$ ) < 0.05. (c) The intrinsic viscosity  $[\eta]$  of microgel dispersions as a function of  $D_h^3$ . (d) The effective volume fraction  $\phi_{\text{eff}}$  of microgels as a function of temperature.

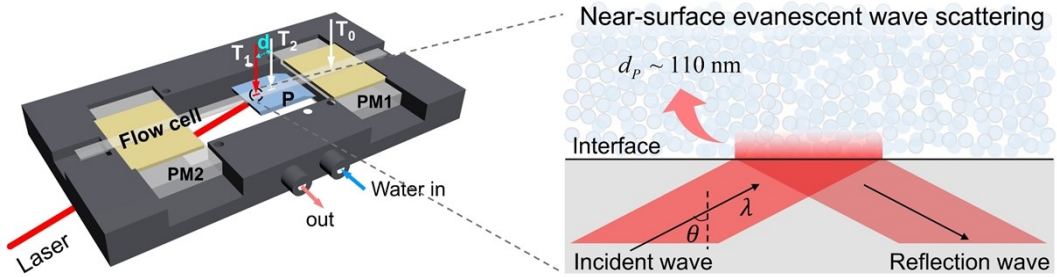

**Fig. S2** Schematic of the thermal control device incorporated on a total internal reflection microscope (TIRM). P is the 70° prism, PM1 and PM2 are the Peltier modules and/or copper plates (yellow).  $T_0$ ,  $T_1$ , and  $T_2$  are temperatures at individual regions along the flow cell.  $d$  ( $\sim 5 \text{ mm}$ ) is the distance between regions  $T_1$  and  $T_2$ . At region  $T_1$ , an evanescent field is generated on the liquid/glass interface with  $d_p \sim 110 \text{ nm}$ , where the scattering intensity is recorded by a sCMOS camera.

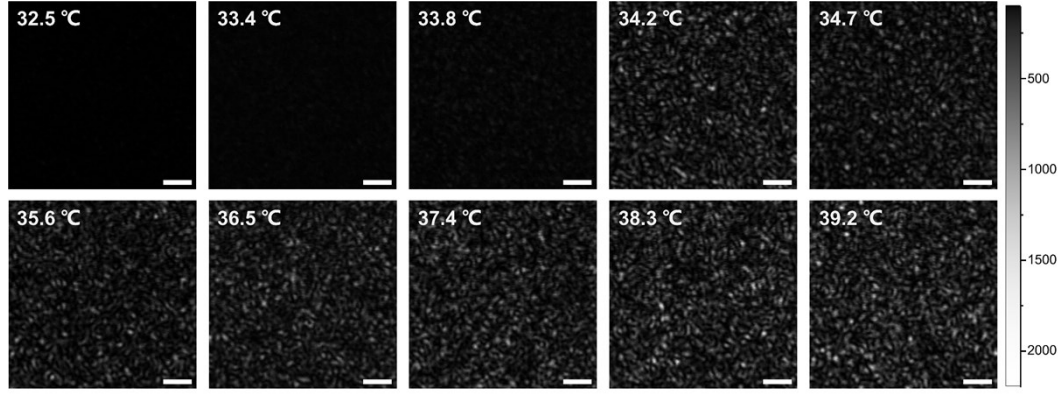

**Fig. S3** Original total internal reflection microscope (TIRM) images of colloidal gels. The dynamic speckles emerge after 34 °C, corresponding to  $\phi_{\text{eff}} \sim 0.23$ . Scale bars represent 5  $\mu\text{m}$ . Gray scale represents the intensity.

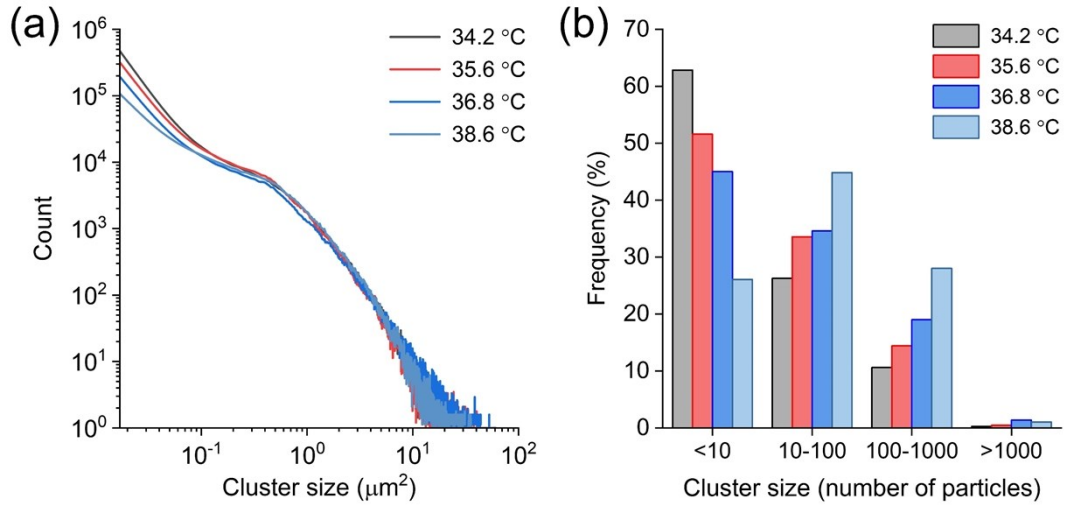

**Fig. S4** Cluster size distribution in count (a) and histogram (b) at different temperatures. The clusters are 2D projections, which sizes are counted based on a sequence of binarized images after default thresholding via *ImageJ*.

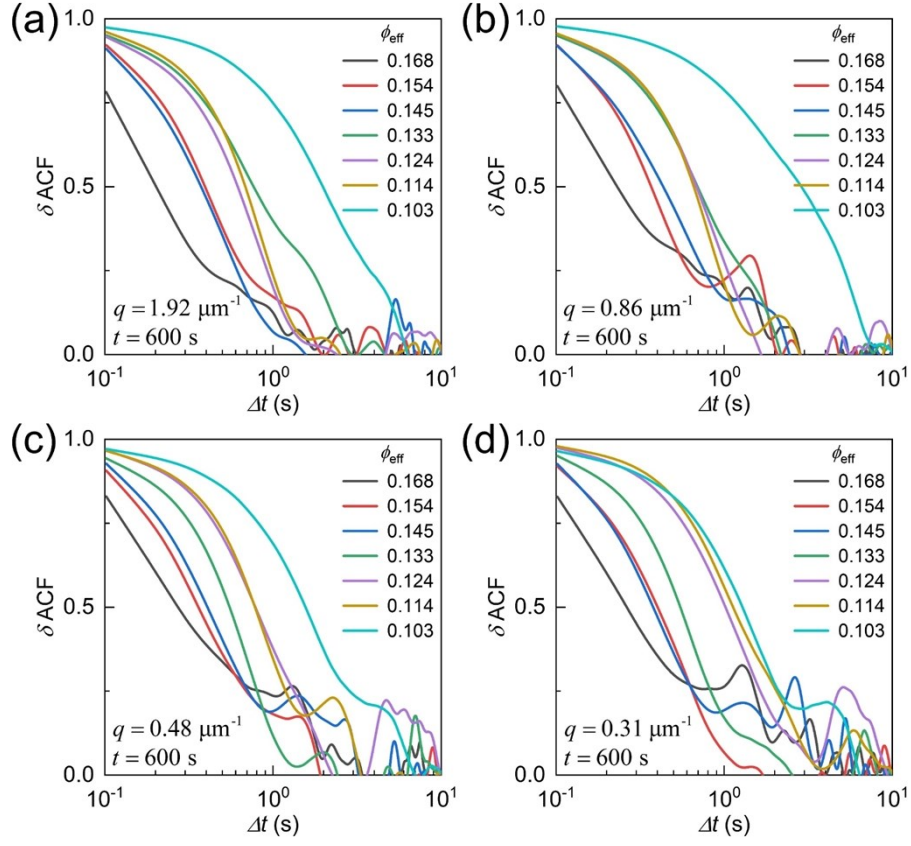

**Fig. S5** Typical density-fluctuation autocorrelation functions ( $\delta\text{ACF}$ ) for  $\phi_{\text{eff}}$  varying from 0.103 to 0.168 at various  $q$  from 0.31  $\mu\text{m}^{-1}$  to 1.92  $\mu\text{m}^{-1}$  ( $t = 600$  s).

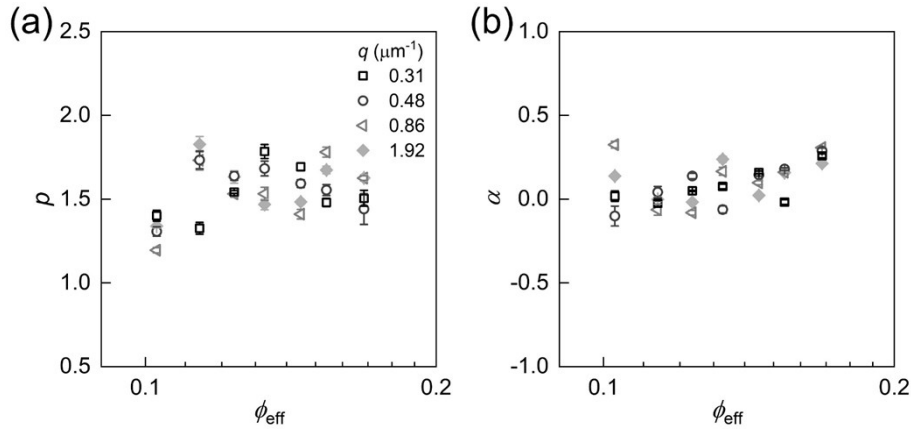

**Fig. S6** Fitting parameters  $p$  and  $\alpha$  for the compressed exponential decay functions at different  $\phi_{\text{eff}}$  at various  $q$  from 0.31  $\mu\text{m}^{-1}$  to 1.92  $\mu\text{m}^{-1}$  ( $t = 600$  s).

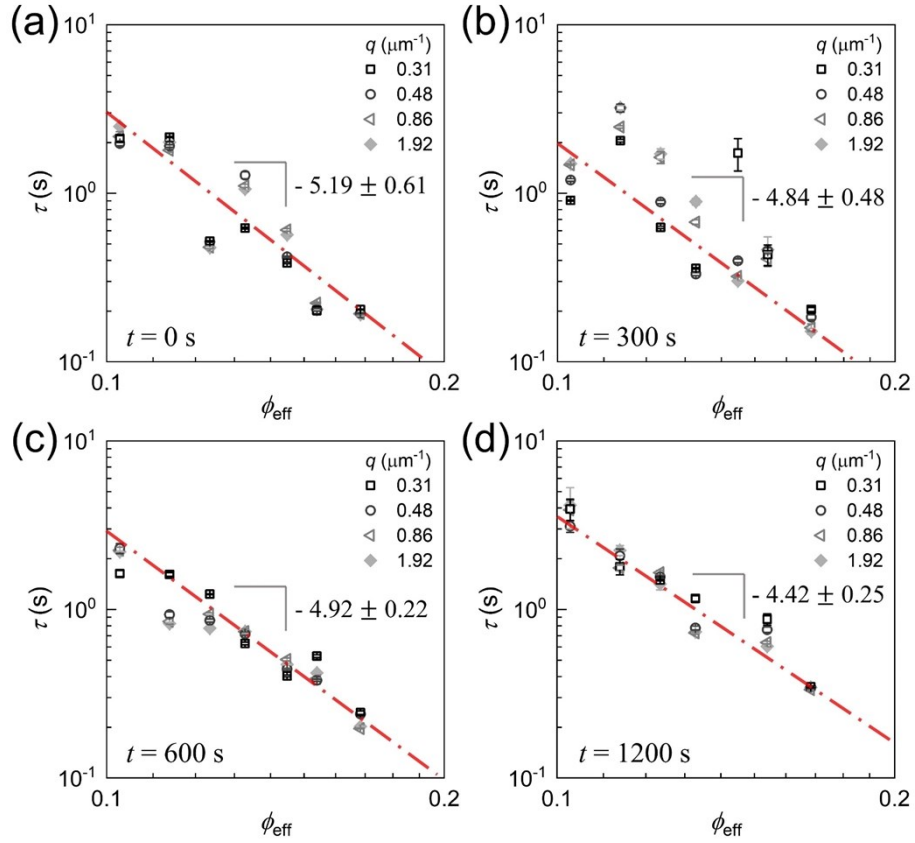

**Fig. S7** Relaxation time  $\tau$  as a function of  $\phi_{\text{eff}}$  at various  $q$  from  $0.31 \mu\text{m}^{-1}$  to  $1.92 \mu\text{m}^{-1}$  at  $t = 0$  s (a), 300 s (b), 600 s (c), and 1200 s (d). The dash-dotted lines represent the linear fitting.

## References

1. Y. Zhao, Y. Cao, Y. L. Yang and C. Wu, *Macromolecules*, 2003, **36**, 855-859.
2. T. Kureha, H. Minato, D. Suzuki, K. Urayama and M. Shibayama, *Soft Matter*, 2019, **15**, 5390-5399.
3. S. Minami, T. Watanabe, D. Suzuki and K. Urayama, *Soft Matter*, 2018, **14**, 1596-1607.
4. A. Omari, R. Tabary, D. Rousseau, F. L. Calderon, J. Monteil and G. Chauveteau, *J. Colloid Interface Sci.*, 2006, **302**, 537-546.
